# Supplementary material for: Recent advances in CRISPR-Cas9-based genome insertion technologies
Source: PubMed Central journal article supplement — Mol Ther Nucleic Acids. 2024 Feb 5;35(1):102138. doi: 10.1016/j.omtn.2024.102138 (PMC10878794; doi:10.1016/j.omtn.2024.102138), 2024-02-05
Supplement: mmc1.pdf [file mmc1.pdf]

**OMTN, Volume 35**

**Supplemental information**

**Recent advances in CRISPR-Cas9-based  
genome insertion technologies**

**Xinwen Chen, Jingjing Du, Shaowei Yun, Chaoyou Xue, Yao Yao, and Shuquan Rao**

## **Supplemental Information**

**Table S1.** Performance of targeted genome insertion technologies in diverse cell types

**Table S2.** Applications of genome insertion technologies in preclinical and clinical studies
